# Supplementary material
Source: PubMed Central journal article supplement (PMC3277229)

Figure S1

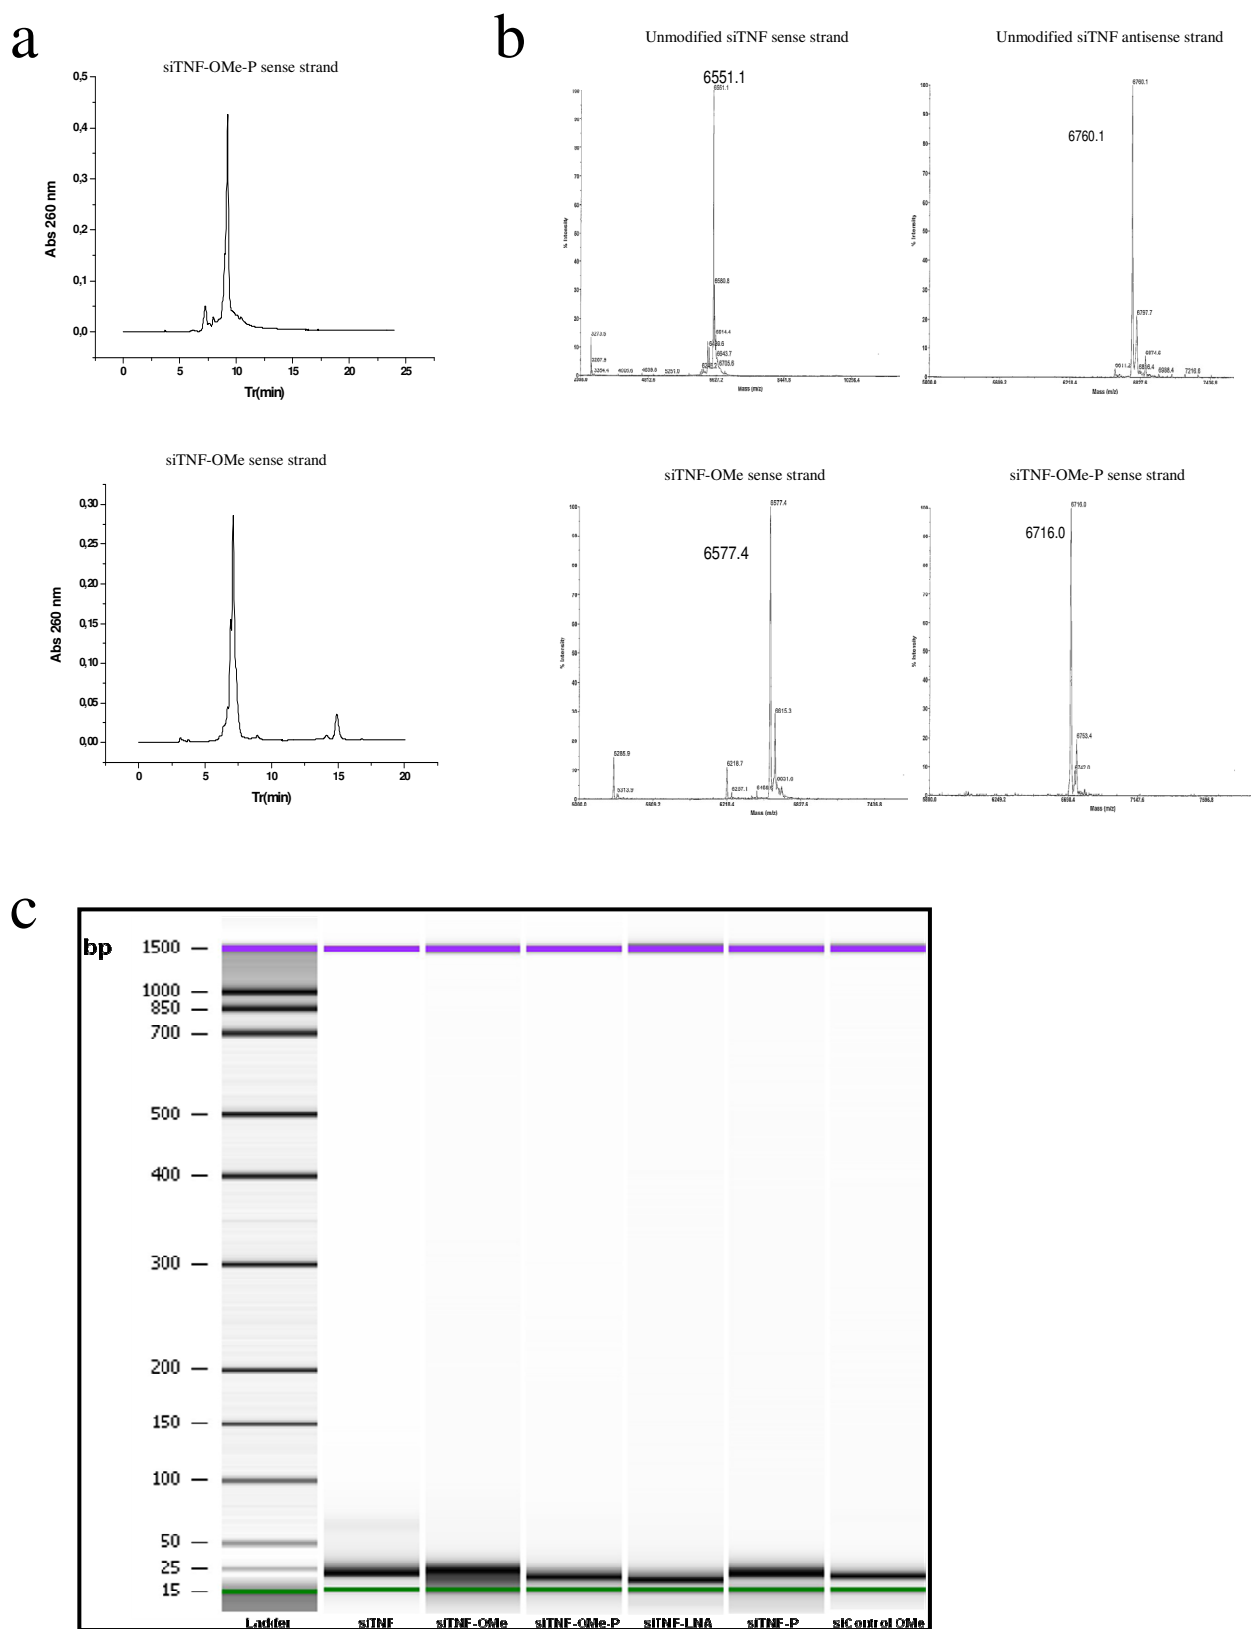

Supplement: mt2011236x1.pdf [file mt2011236x1.pdf]

Figure S2

a *In vitro*

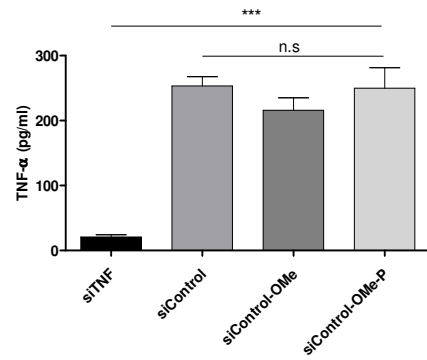

b *In vivo*

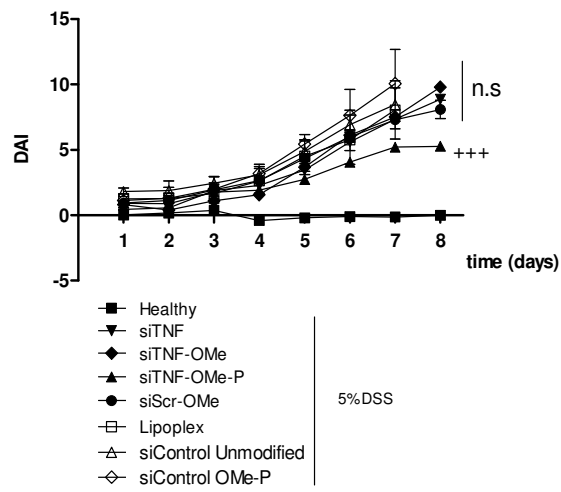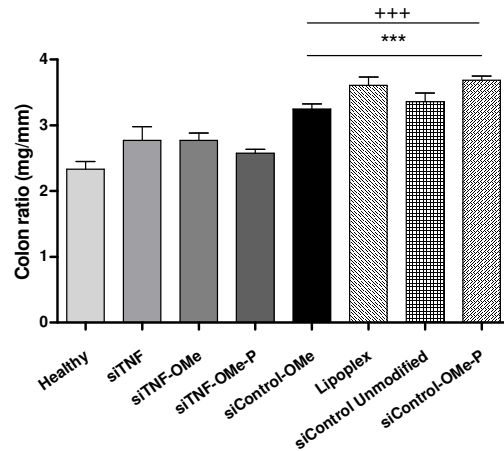

Supplement: mt2011236x2.pdf [file mt2011236x2.pdf]

Figure S3

a

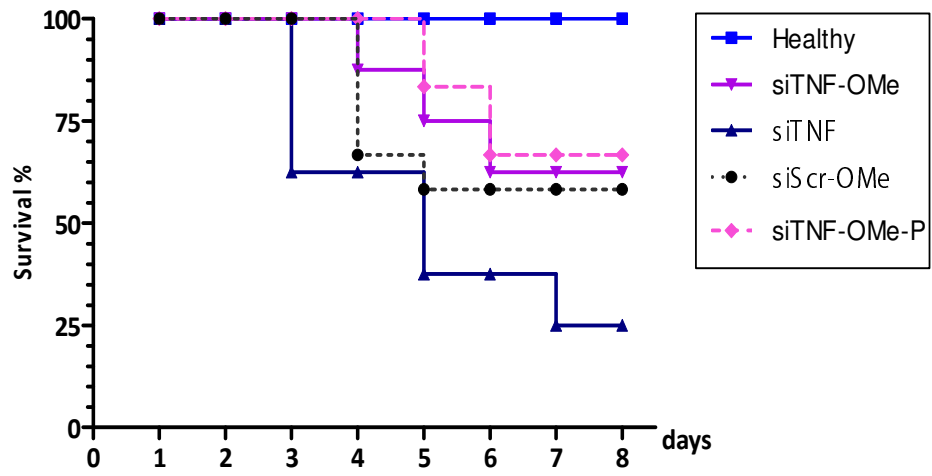

b

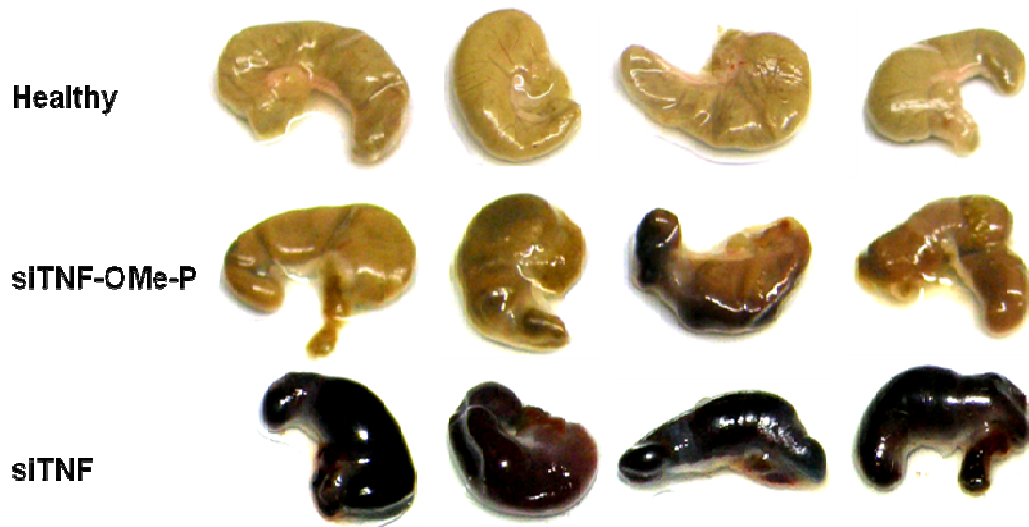

Supplement: mt2011236x3.pdf [file mt2011236x3.pdf]
